# Supplementary material
Source: ML conference proceedings conference paper supplement (https://proceedings.neurips.cc/paper_files/paper/2022/hash/d0724f5d6108517c3eab35f77f156967-Abstract.html)
Supplement: Supplementary file 1 [file d0724f5d6108517c3eab35f77f156967-Supplemental-Conference.zip]

Archive with 1 entries (1 files):
- dca_supp.pdf
